# Supplementary material for: A molecular investigation of the nanostructure and dynamics of phosphoric–triflic acid blends of hydrated ABPBI [poly(2,5-benzimidazole)] polymer electrolyte membranes
Source: Royal Society of Chemistry journal article supplement (doi:10.1039/c2sm26927a), 2012-11-22
Supplement: c2sm26927a.pdf [file c2sm26927a.pdf]

## A Molecular investigation of nanostructure and dynamics of Phosphoric/Triflic acid blends of hydrated ABPBI [poly(2,5-benzimidazole)] Polymer Electrolyte Membrane

Anurag Prakash Sunda, Minal More and Arun Venkatnathan\*

### Supporting Information:

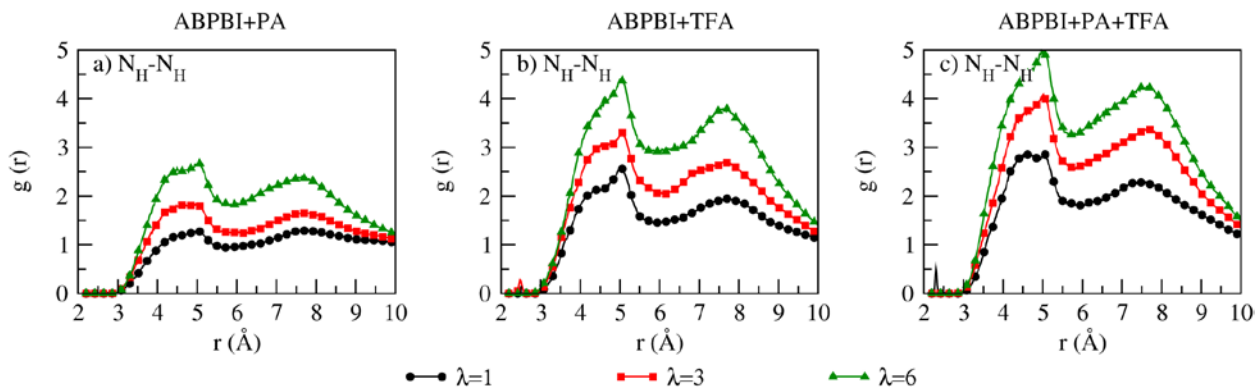

**Figure S1:**  $N_H-N_H$  RDFs from a) ABPBI+PA blends, b) ABPBI+TFA blends and c) ABPBI+PA+TFA blends.

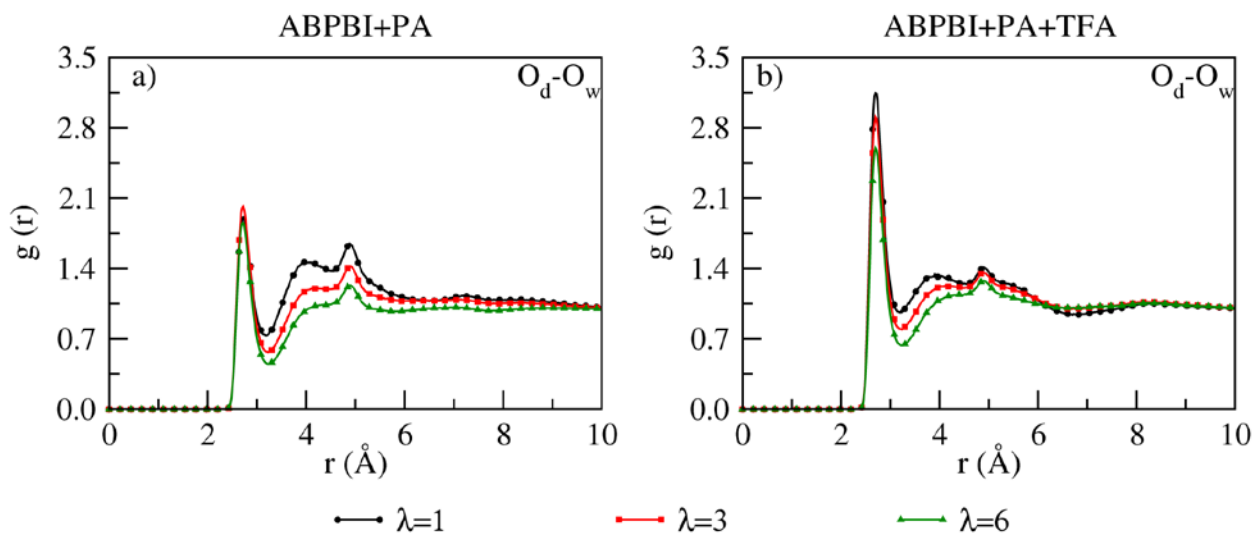

**Figure S2:**  $O_d-O_w$  RDFs from a) ABPBI+PA blends and b) ABPBI+PA+TFA blends.

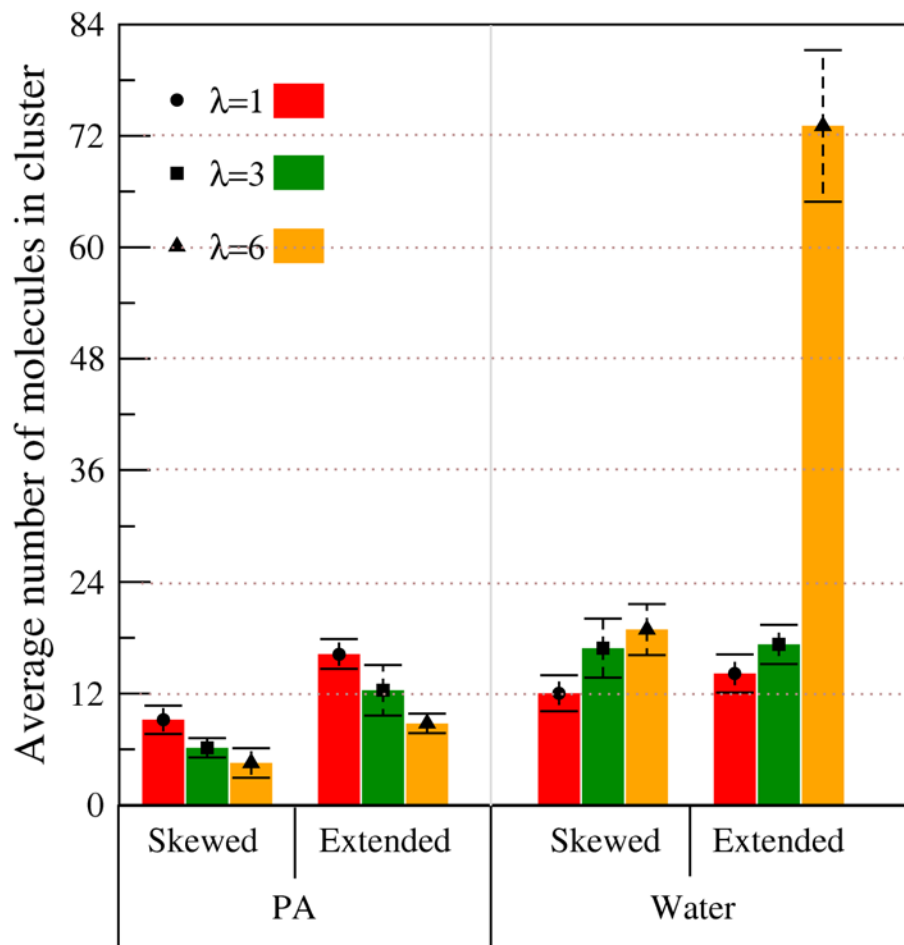

**Figure S3:** Average number of PA and water molecules in a cluster from ABPBI+PA blends.  
[Error bar represents standard deviation]

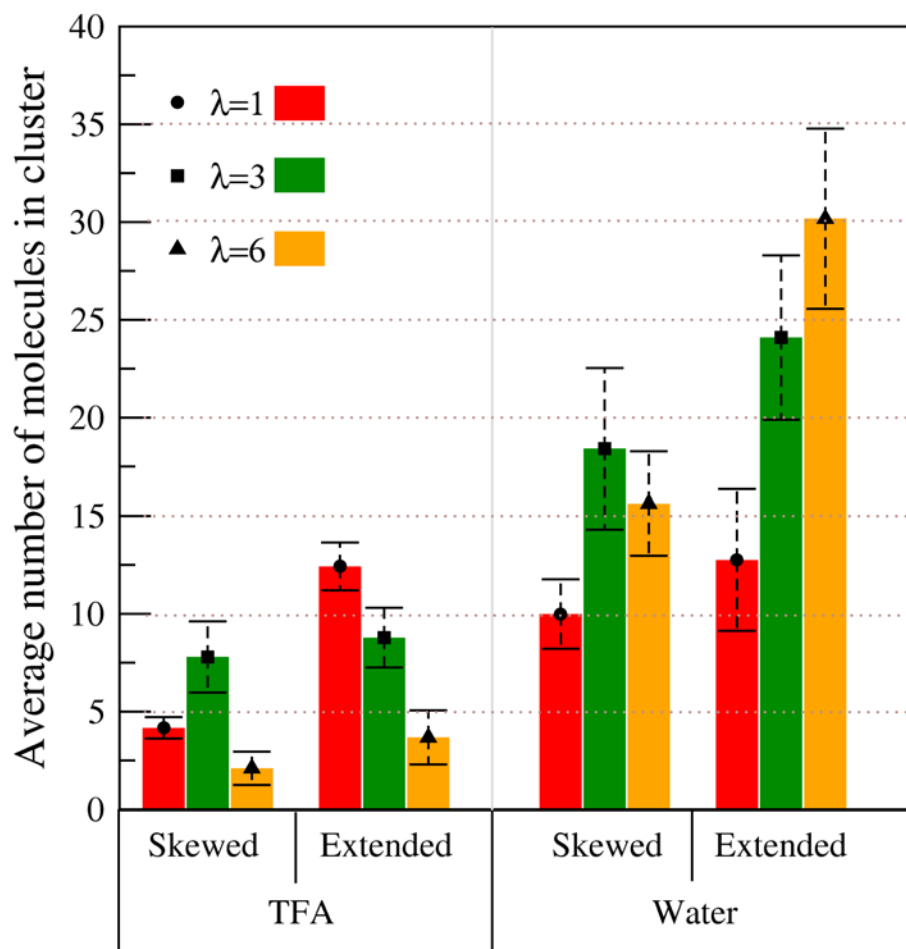

**Figure S4:** Average number of TFA and water molecules in a cluster from ABPBI+TFA blends.  
[Error bar represents standard deviation]

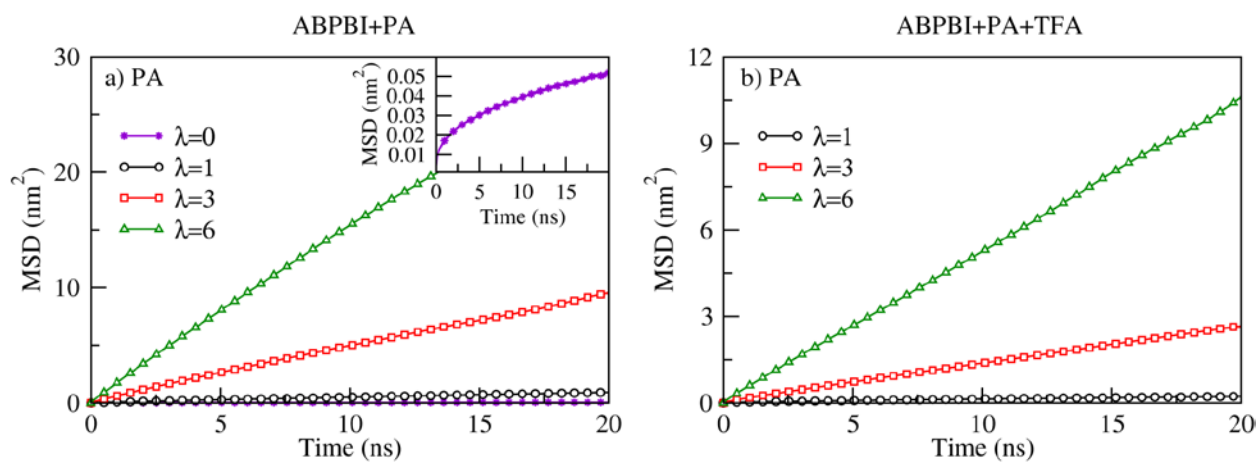

**Figure S5:** Mean Square Displacement of PA.

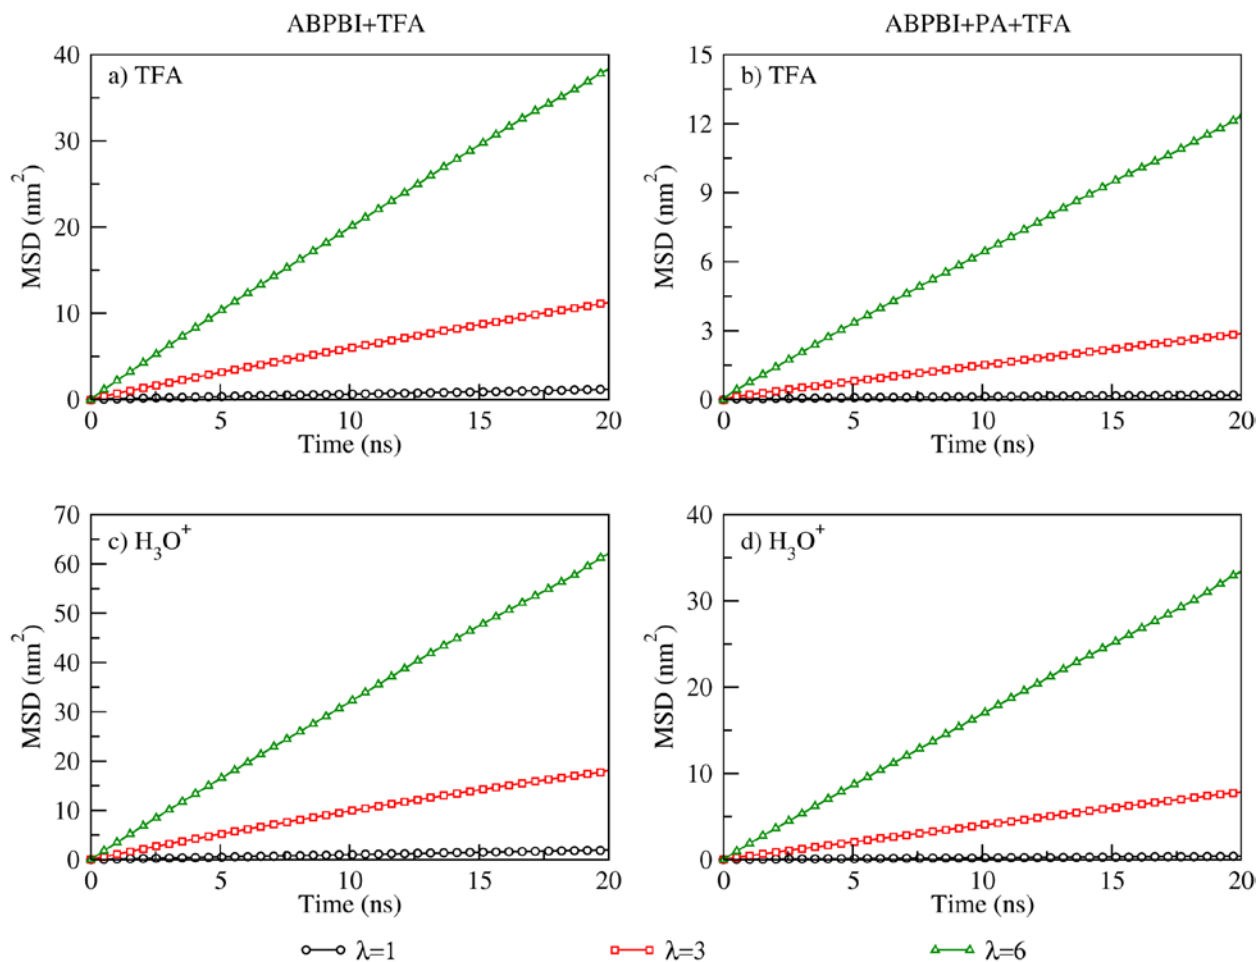

**Figure S6:** Mean Square Displacement of (a, b) TFA and (c, d) hydronium ions.

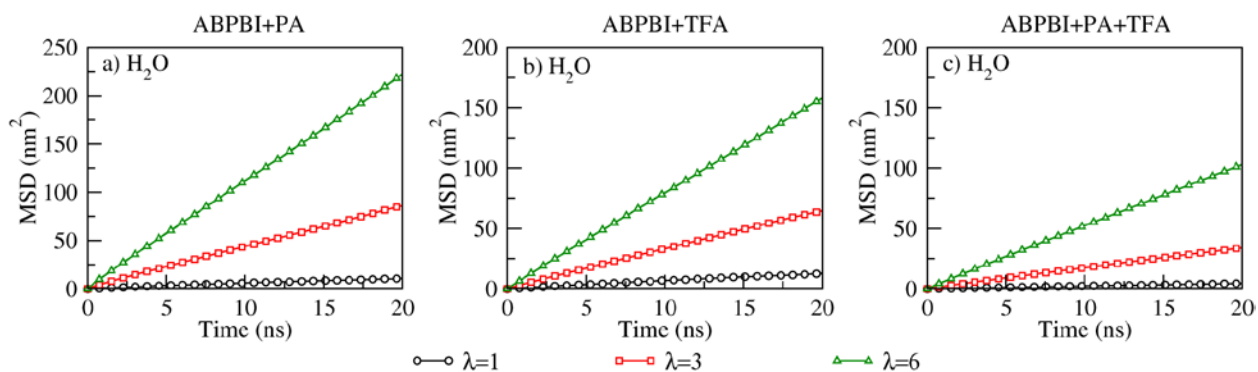

**Figure S7:** Mean Square Displacement of water molecules.

**Table S1:** Box length (Å), average density (g cm<sup>-3</sup>), end-to-end polymer chain distance (R<sub>E-E</sub>), radius of gyration (R<sub>g</sub>) and Diffusion coefficients (D<sub>A</sub> × 10<sup>-5</sup> cm<sup>2</sup> sec<sup>-1</sup>) of PA, hydronium ions, TFA and water molecules in hydrated (λ=3) ABPBI+PA+TFA blend.

| System                                                                                                             | [ABPBI + PA + TFA] <sup>a</sup> | [ABPBI + PA + TFA] <sup>b</sup> |
|--------------------------------------------------------------------------------------------------------------------|---------------------------------|---------------------------------|
| Total No. of atoms                                                                                                 | 45568                           | 91008                           |
| No. of PA molecules                                                                                                | 1280                            | 2560                            |
| No. of TFA molecules                                                                                               | 1280                            | 2560                            |
| No. of water molecules                                                                                             | 3840                            | 7680                            |
| Box length (Å)                                                                                                     | 80.5541                         | 101.6332                        |
| Density (g cm <sup>-3</sup> )                                                                                      | 1.5369 ± 0.0022                 | 1.5301 ± 0.0022                 |
| R <sub>E-E</sub> (Å)                                                                                               | 29.1042 ± 11.2577               | 20.2490 ± 9.2409                |
| R <sub>g</sub> (Å)                                                                                                 | 11.8469 ± 1.9312                | 11.9717 ± 1.2403                |
| R <sub>E-E</sub> /R <sub>g</sub>                                                                                   | 2.45                            | 1.69                            |
| D <sub>A</sub> of PA                                                                                               | 0.0217 ± 0.0002                 | 0.0191 ± 0.0008                 |
| D <sub>A</sub> of hydronium ions                                                                                   | 0.0655 ± 0.0001                 | 0.0767 ± 0.0005                 |
| D <sub>A</sub> of TFA                                                                                              | 0.0232 ± 0.0002                 | 0.0267 ± 0.0017                 |
| D <sub>A</sub> of water                                                                                            | 0.2792 ± 0.0085                 | 0.3098 ± 0.0133                 |
| <sup>a</sup> (polymer chain from 10 monomers: i.e. n=10), <sup>b</sup> (polymer chain from 20 monomers: i.e. n=20) |                                 |                                 |

**Table S2:** Co-ordination number calculated using the first minima (in parenthesis) from interactions in hydrated (λ=3) ABPBI+PA+TFA blend.

| Polymer chain length | N-N<br>(5.8 Å) | N-N <sub>H</sub><br>(3.6 Å) | N-H <sub>N</sub><br>(3.2 Å) | H <sub>N</sub> -O <sub>w</sub><br>(2.6 Å) |
|----------------------|----------------|-----------------------------|-----------------------------|-------------------------------------------|
| n=10                 | 2.56           | 0.41                        | 0.41                        | 0.22                                      |
| n=20                 | 2.60           | 0.39                        | 0.39                        | 0.24                                      |

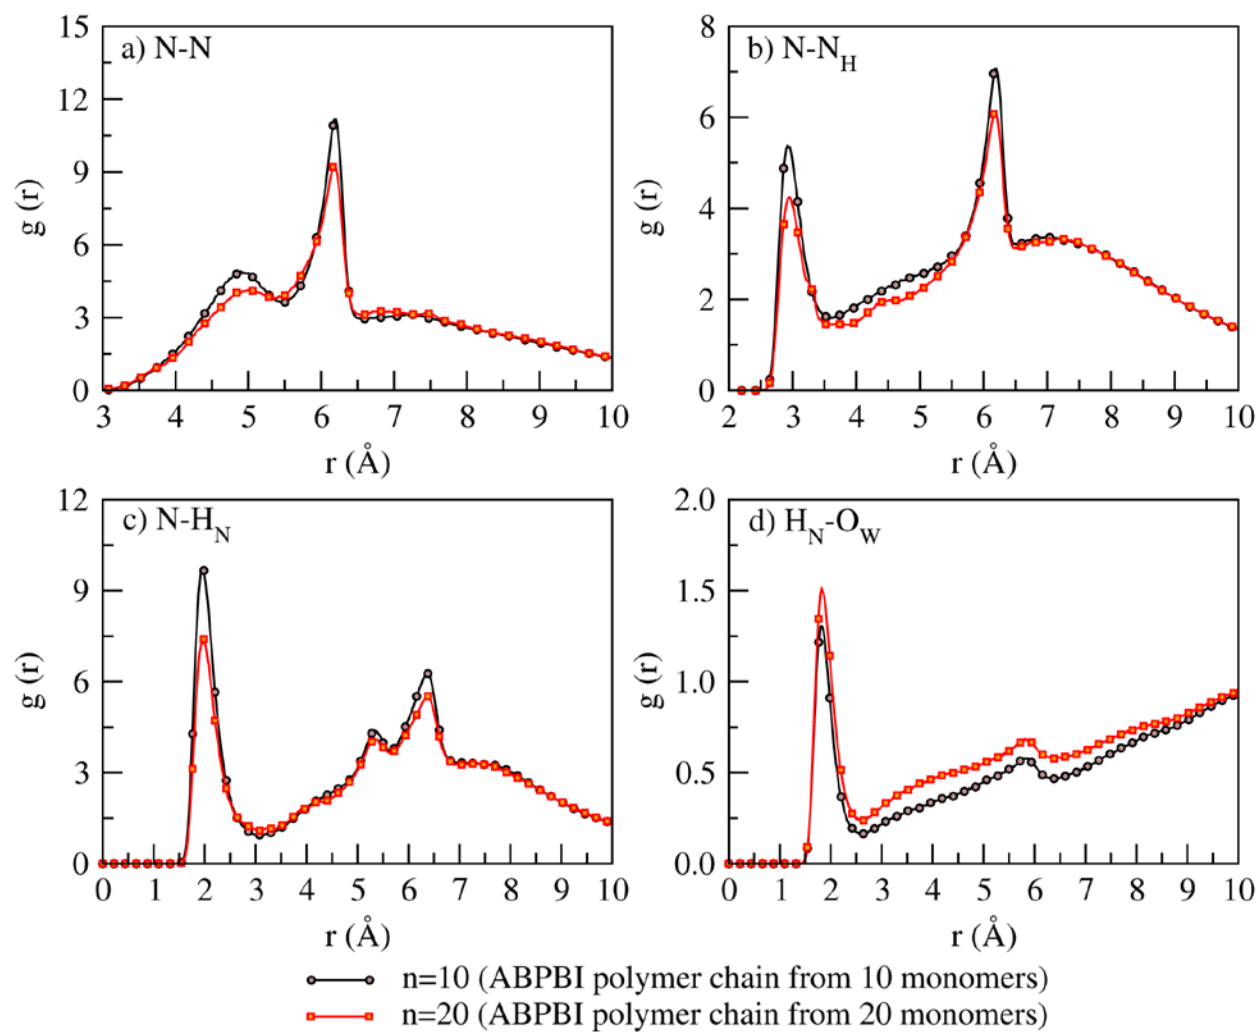

**Figure S8:** RDFs of a) N-N, b) N-N<sub>H</sub>, c) N-H<sub>N</sub> and d) H<sub>N</sub>-O<sub>W</sub> in hydrated ( $\lambda=3$ ) ABPBI+PA+TFA blend.

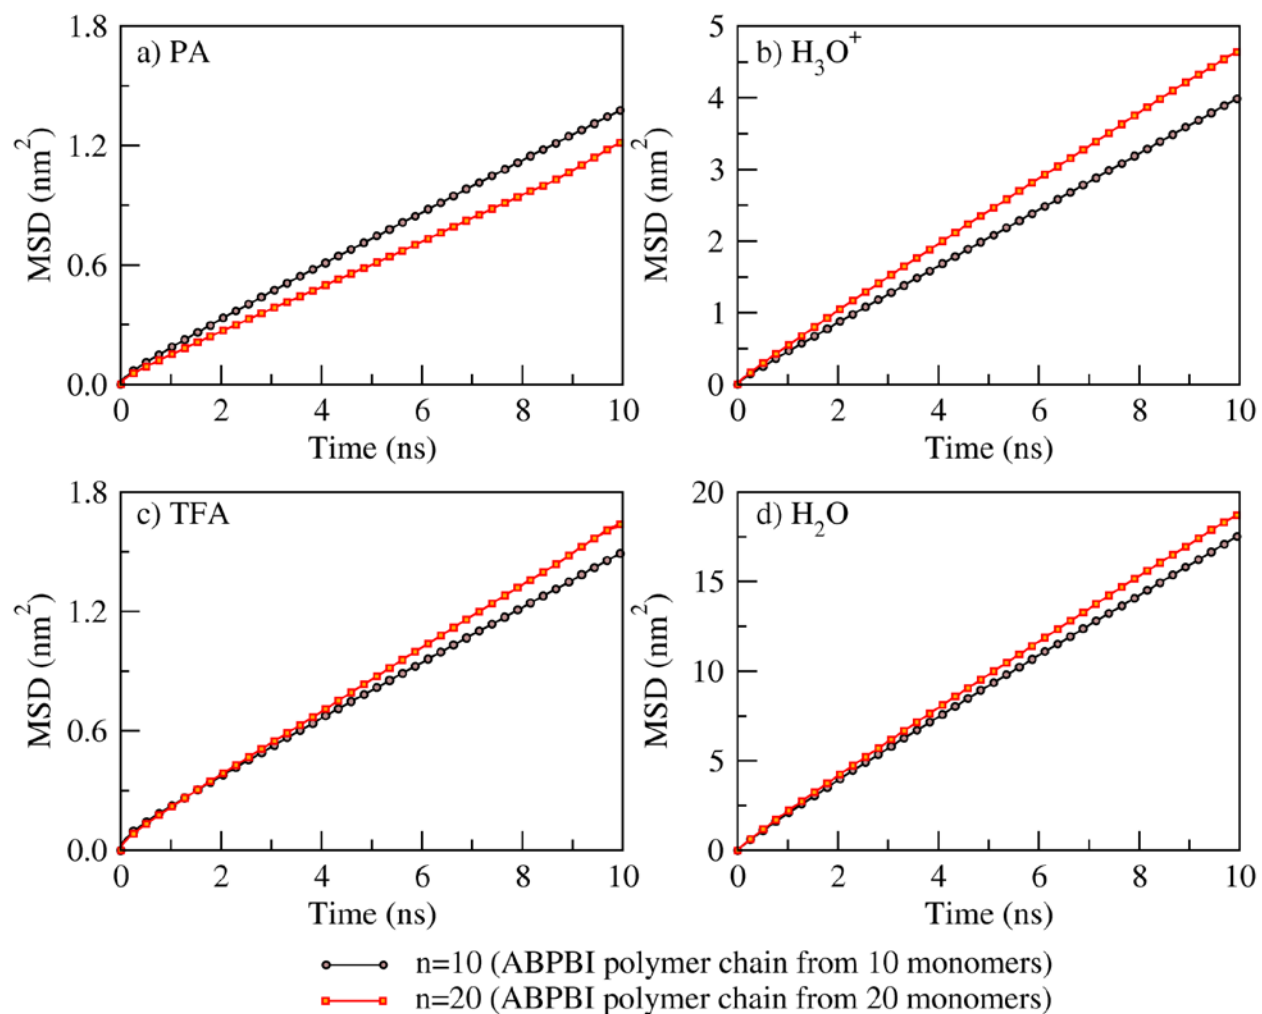

**Figure S9:** Mean Square Displacement of (a) PA, (b) hydronium ions, (c) TFA, and (d) water from hydrated ( $\lambda=3$ ) ABPBI+PA+TFA blend.
